# Supplementary material for: White light emission from a green cyclometalated platinum(ii) terpyridylphenylacetylide upon titration with Zn(ii) and Eu(iii )
Source: Royal Society of Chemistry journal article supplement (doi:10.1039/d0dt02336a), 2020-01-01
Supplement: d0dt02336a1.pdf [file d0dt02336a1.pdf]

## **Supporting Information for:**

### **White light emission from a green cyclometalated platinum(II) terpyridylphenylacetylde by titration of Zn(II) and Eu(III)**

Yuqing Qiu,<sup>a</sup> Yuquan Feng,<sup>b</sup> Qian Zhao,<sup>b</sup> Hongwei Wang,<sup>b</sup> Yingchen Guo<sup>b</sup> and Dongfang  
Qiu\*<sup>b</sup>

*<sup>a</sup>School of Materials Science and Engineering, Zhengzhou University, Zhengzhou City,  
Henan Province, 450001, P. R China*

*<sup>b</sup>College of Chemistry and Pharmacy Engineering, Nanyang Normal University, Nanyang  
City, Henan Province, 473061, P. R China*

**Table S1.** Crystal data and crystal structure parameters of complex **1** and **3**.

| Compound                                                  | <b>1</b>                                                    | <b>3</b>                                                    |
|-----------------------------------------------------------|-------------------------------------------------------------|-------------------------------------------------------------|
| Empirical formula                                         | C <sub>36</sub> H <sub>45</sub> ClN <sub>4</sub> Pt         | C <sub>59</sub> H <sub>59</sub> N <sub>7</sub> Pt           |
| Formula weight                                            | 764.30                                                      | 1061.22                                                     |
| Temperature/ K                                            | 100(2)                                                      | 100(2)                                                      |
| Wavelength/Å                                              | 0.71073                                                     | 0.71073                                                     |
| Crystal system                                            | Triclinic                                                   | Triclinic                                                   |
| Space group                                               | <i>P</i> -1                                                 | <i>P</i> -1                                                 |
| <i>a</i> / Å                                              | 9.751(5)                                                    | 10.536(8)                                                   |
| <i>b</i> / Å                                              | 10.049(9)                                                   | 11.942(10)                                                  |
| <i>c</i> / Å                                              | 17.569(19)                                                  | 20.816(17)                                                  |
| $\alpha$ / (°)                                            | 77.168(18)                                                  | 96.159(3)                                                   |
| $\beta$ / (°)                                             | 73.910(17)                                                  | 97.366(3)                                                   |
| $\gamma$ / (°)                                            | 85.261(2)                                                   | 110.571(2)                                                  |
| Volume / Å <sup>3</sup>                                   | 1612.5(2)                                                   | 2398.8(3)                                                   |
| <i>Z</i>                                                  | 2                                                           | 2                                                           |
| <i>D</i> <sub>c</sub> / (g·cm <sup>-3</sup> )             | 1.574                                                       | 1.469                                                       |
| Absorption coefficient / mm <sup>-1</sup>                 | 4.465                                                       | 2.972                                                       |
| <i>F</i> (000)                                            | 768                                                         | 1080                                                        |
| Crystal size / mm                                         | 0.32×0.29×0.25                                              | 0.29×0.25×0.22                                              |
| $\theta$ range for data collection / (°)                  | 2.186 to 28.313                                             | 2.240 to 26.000                                             |
| Limiting indices                                          | -12≤ <i>h</i> ≤13, -13≤ <i>k</i> ≤12, -<br>23≤ <i>l</i> ≤22 | -11≤ <i>h</i> ≤12, -14≤ <i>k</i> ≤14, -<br>25≤ <i>l</i> ≤25 |
| Completeness to $\theta = 25.00^\circ$                    | 99.7 %                                                      | 99.7 %                                                      |
| Data / restraints / parameters                            | 8000 / 15 / 381                                             | 9387 / 12 / 642                                             |
| Goodness-of-fit on <i>F</i> <sup>2</sup>                  | 1.082                                                       | 1.028                                                       |
| Final R indices [ <i>I</i> > 2σ( <i>I</i> )] <sup>a</sup> | R <sub>int</sub> = 0.0613                                   | R <sub>int</sub> = 0.0949                                   |
| R indices (all data)                                      | R <sub>1</sub> = 0.0435, wR <sub>2</sub> = 0.0803           | R <sub>1</sub> = 0.0488, wR <sub>2</sub> = 0.0769           |
| Largest diff. peak and hole/(e·Å <sup>-3</sup> )          | 2.020 and -1.303                                            | 0.976 and -1.191                                            |

<sup>a</sup> R<sub>1</sub> =  $\sum ||F_0| - |F_c|| / \sum |F_0|$ , wR<sub>2</sub> =  $\{ \sum w[(F_0)^2 - (F_c)^2]^2 / \sum w[(F_0)^2]^2 \}^{1/2}$

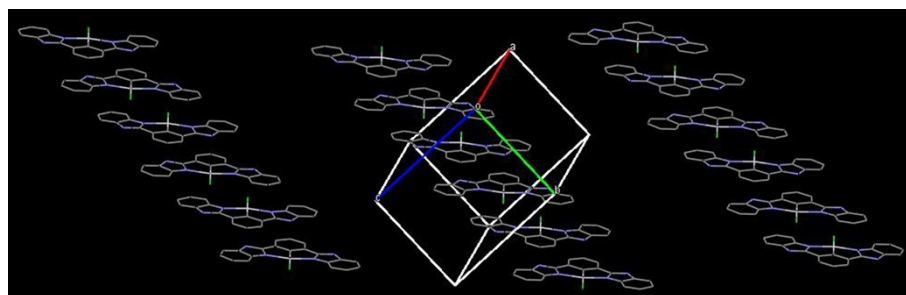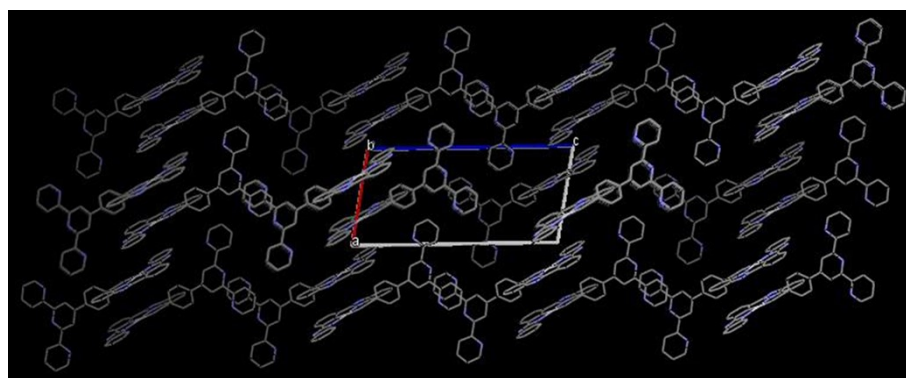

**Figure S1.** Crystal packing diagrams of complex **1** (top) and **3** (bottom) (hydrogen atoms and N-octyl substituents have been omitted for clarity).

**Table S2.** Photophysical properties of complex **1-3**.<sup>a</sup>

| Complex  | $\lambda_{\text{max, abs}}$ (nm)<br>( $\epsilon \times 10^4 \text{ dm}^3 \cdot \text{mol}^{-1} \cdot \text{cm}^{-1}$ ) | $\lambda_{\text{max, em}}$ (nm)                                            | $\Phi_{\text{em}}^d$ | $\tau_{\text{em}}^d$ ( $\mu\text{s}$ ) |
|----------|------------------------------------------------------------------------------------------------------------------------|----------------------------------------------------------------------------|----------------------|----------------------------------------|
| <b>1</b> | 403(1.84), 387(1.61), 354(sh, 0.73), 307(3.13)                                                                         | 507, 546, 590, 643(sh) (Pt) <sup>b</sup>                                   | 0.10                 | 4.06                                   |
| <b>2</b> | 404(1.53), 387(1.67), 366 (1.76), 309(3.96), 298 (4.21)                                                                | 508, 549, 591, 643(sh) (Pt) <sup>b</sup>                                   | 0.08                 | 3.91                                   |
| <b>3</b> | 399(sh, 1.76), 379(sh, 2.74), 365 (3.30), 308 (5.60), 300 (5.69)                                                       | 379, 404 (TPY); <sup>c</sup><br>506, 547, 592, 643(sh) (Pt) <sup>b,c</sup> | 0.08                 | 3.43                                   |

<sup>a</sup> Measured in an air-saturated  $\text{CH}_2\text{Cl}_2$  solution at room temperature. <sup>b</sup> Excited wavelength is 400 nm.

<sup>c</sup> Excited wavelength is 300 nm. <sup>d</sup> Absolute quantum yield and lifetime.

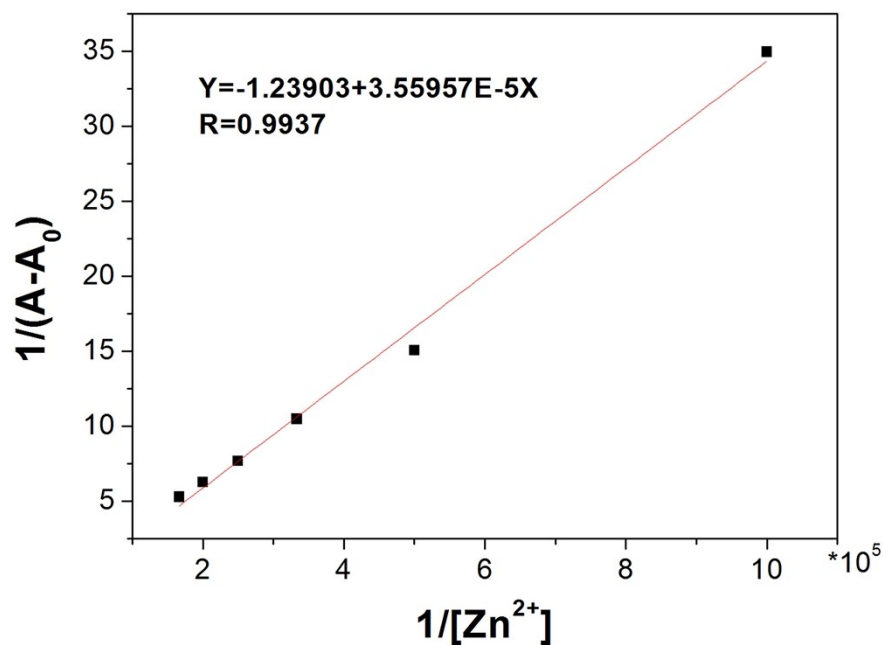

**Figure S2.** Benesi-Hildebrand analysis of the UV-vis absorption titration data of complex **3** in an air-saturated  $\text{CH}_2\text{Cl}_2$  solution at room temperature.
